## Water quality index and spatio-temporal perspective of a large Brazilian water reservoir

Karla Lorrane de Oliveira, Ramatisa Ladeia Ramos, Sílvia Corrêa Oliveira and Cristiano Christofaro

### ABSTRACT

The water spatio-temporal variability of the Irapé Hydroelectric Power Plant reservoir and its main tributaries was evaluated by analysing the temporal trend of the main parameters and applying the Canadian Council of Ministers of the Environment Water Quality Index (CCME WQI), using data from 2008 to 2018. This reservoir is in Minas Gerais, Brazil, and covers an area of approximately 143 km<sup>2</sup> across seven municipalities. The dissolved iron (DFe) presented the highest percentage of standards violations (31.7% to 80.5%), most frequently in the reservoir tributaries. The Mann–Kendall tests indicated that the monitoring stations showed an increasing trend of 78.5% N–NH<sub>4</sub><sup>+</sup> and 64.1% DFe. During the evaluated period, the reservoir waters were classified as excellent (1.2%), good (61.3%), acceptable (29.5%), and poor (8.0%) according to the WQI for the proposed use. The poorest quality classes were more frequent in the tributaries, especially in the year 2009. The WQI seasonal assessment indicated a worsening during the rainy season in 57% of the stations, as a result of external material transport to the water bodies. The CCME WQI, in conjunction with temporal statistical analysis, contributed to the interpretation of the monitoring data, generating important information for reservoir water quality management.

**Key words** | environmental statistics, hydroelectric reservoir, spatio-temporal perspective, water quality index

**Karla Lorrane de Oliveira**  
**Ramatisa Ladeia Ramos** (corresponding author)  
**Sílvia Corrêa Oliveira**  
 Department of Sanitary and Environmental Engineering,  
 Federal University of Minas Gerais,  
 P.O. Box 1294, ZIP 30.270-901, Belo Horizonte,  
 MG,  
 Brazil  
 E-mail: [lramos.eng@gmail.com](mailto:lramos.eng@gmail.com)

**Cristiano Christofaro**  
 Department of Forestry Engineering,  
 Federal University of Jequitinhonha and Mucuri Valleys,  
 P.O. Box 5000, ZIP 39.100-000, Diamantina,  
 MG,  
 Brazil

### HIGHLIGHTS

- The large Brazilian reservoir and tributaries water was studied by statistical techniques in conjunction with a WQI.
- Mann-Kendall tests indicated the stations with an increasing trend in the parameters analyzed.
- The seasonal WQI indicated a worsening in the stations in the rainy seasons.
- CCME WQI and temporal statistical analysis generated information that can be used in reservoir management.

### INTRODUCTION

Quality assessment is essential for the proper use of water in different human activities and is affected by natural and

anthropogenic factors as well as by hydrological dynamics. Lentic ecosystems, such as reservoirs, have characteristics that affect the spatio-temporal scale, presenting a different dynamic to lotic ecosystems. Thus, programmes for monitoring physical, chemical, and biological parameters of water quality in these environments are indispensable for a

This is an Open Access article distributed under the terms of the Creative Commons Attribution Licence (CC BY 4.0), which permits copying, adaptation and redistribution, provided the original work is properly cited (<http://creativecommons.org/licenses/by/4.0/>).

doi: 10.2166/ws.2020.374

better understanding and evaluation of water body conditions. However, these programmes generate a complex dataset, requiring specific tools for proper interpretation and evaluation of the temporal and spatial variability in the water quality parameters.

Several statistical techniques can be used to understand the temporal dynamics in water reservoirs, such as tests of seasonality and temporal trends of quality parameters (Penev *et al.* 2014). These analyses allow us to determine, statistically, if the values of a random variable are decreasing or increasing over a certain period. We can also determine the seasonality of these variables (Helsel & Hirsch 2002; Yenilmez *et al.* 2011).

The complexity of interpreting many quality parameters can be reduced by applying quality indices that enable simultaneous evaluation of several parameters as well as natural and anthropic influences on the aquatic ecosystem's environmental dynamics. The water quality index (WQI), developed by the Canadian Council of Ministers of the Environment (CCME), aims to assess the distance between the current water quality and the goal established by the water resource framework (CCME 2001). Some studies have demonstrated the applicability and contribution of WQI to water quality diagnosis (Rosemond *et al.* 2008; Tyagi *et al.* 2013). These benefits can be extended with their use in conjunction with other statistical analyses.

The Irapé Hydroelectric Power Plant (HPP), located in the state of Minas Gerais, Brazil, is in a semi-arid region at risk of desertification (Tomasella *et al.* 2018). It has a reservoir of approximately 143 km<sup>2</sup>, whose waters are used by the population of seven municipalities. Population growth and climate change have increased concerns about the water quality in this reservoir. Thus, understanding the water quality spatio-temporal dynamics of the Irapé HPP Reservoir and its tributaries is highly relevant, and may support the actions of decision makers (Helsel & Hirsch 2002; Penev *et al.* 2014) while contributing to a more efficient use of its waters by the local population.

In this study, the spatio-temporal variability of surface water in the Irapé HPP Reservoir and its main tributaries was evaluated using statistical techniques, comparison with environmental standards, and application of the CCME WQI. The association between statistical analysis and quality indices allows the identification of the points under greatest anthropogenic pressure in the reservoir and its surroundings,

evaluates natural influences, and helps understand the temporal dynamics of pollutants in the reservoir and its tributaries. Notably, the results of the study can be applied to other reservoirs and can aid in multiple water use analysis.

## MATERIALS AND METHODS

### Study area

The Irapé HPP (Presidente Juscelino Kubitschek Hydroelectric Plant), located at 16°44'15" S and 42°34'30" W, was inaugurated in 2006 and has a 142.95 km<sup>2</sup> reservoir, covering seven municipalities. It has maximum total and useful volumes of 5,954.88 hm<sup>3</sup> and 3,689 hm<sup>3</sup>, respectively, and an installed capacity of 399 MW. The operational water levels vary between 470.8 m and 510 m. The reservoir is in the Alto Jequitinhonha watershed (JQ1 Water Resource Management Units – WRMU), which has an area of 19,855 km<sup>2</sup>, covering a total of 26 municipalities with a population of approximately 120,965 inhabitants. The Alto Jequitinhonha region predominantly produces forest products, specifically from *Eucalyptus* sp., agriculture, and livestock (Silva & Miranda 2015).

### Water quality monitoring data

The secondary data used in the present study were obtained from the water quality monitoring carried out between 2008 and 2018 by the Companhia Energética de Minas Gerais (Cemig) at 14 sampling stations in the Irapé HPP Reservoir and its tributaries. The geographical location and description of the monitoring stations are shown in Figure 1 and Table 1, respectively.

The dataset includes 14 water quality parameters (Table 2) monitored quarterly. The samples were collected and analysed according to Cemig's Manual of Sampling Procedures and Water Analysis Methodologies (2009).

### Water quality parameter limits recommended by legislation

The violation percentages for each database parameter that has a limit recommended in Brazilian legislation by CONAMA, Brazil's National Environmental Council (Brazil 2005), were

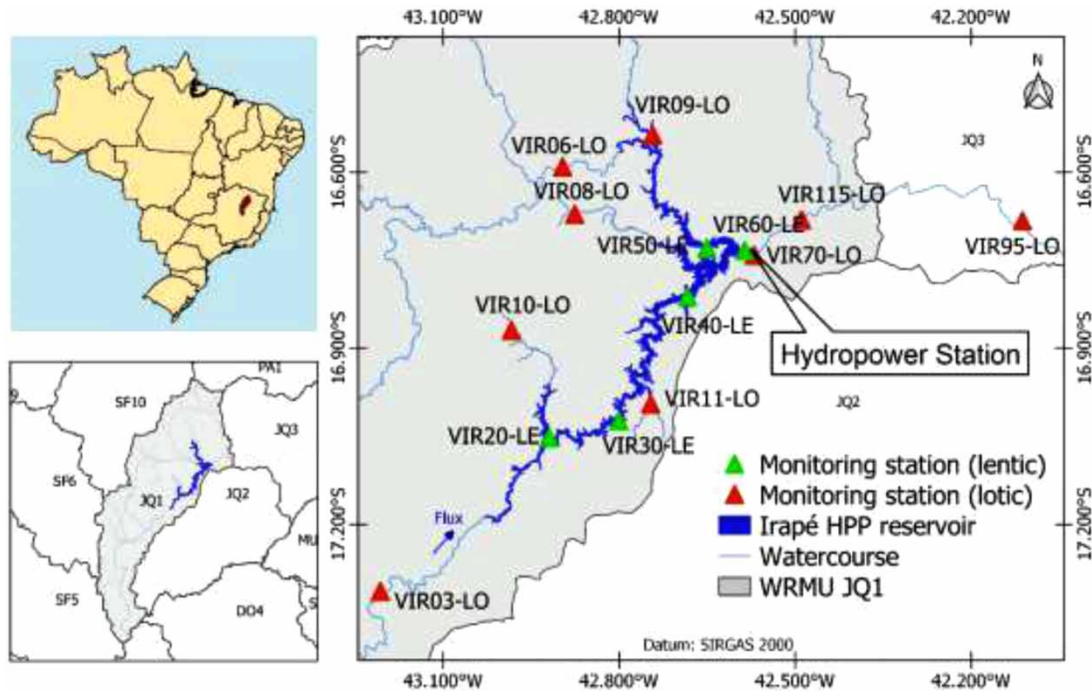

**Figure 1** | Geographic location of the Irapé HPP Reservoir, its tributaries, and the water quality monitoring stations.

**Table 1** | Description of the Irapé HPP Reservoir and its tributaries' monitoring stations

| Station   | Description                                                                 | Watercourse         | Município      | Physical condition |
|-----------|-----------------------------------------------------------------------------|---------------------|----------------|--------------------|
| VIR03-LO  | Reservoir upstream – close to the Terra Branca ferry                        | Jequitinhonha River | Bocaiuva       | Lotic              |
| VIR06-LO  | Reservoir upstream – below the bridge that connects Grão Mogol to Cristália | Itacambiruçu River  | Grão Mogol     | Lotic              |
| VIR08-LO  | Reservoir upstream – on the bridge that connects Grão Mogol to Cristália    | Soberbo River       | Cristália      | Lotic              |
| VIR09-LO  | Reservoir upstream – on the bridge that connects Grão Mogol to Irapé HPP    | Ventania River      | Grão Mogol     | Lotic              |
| VIR10-LO  | Reservoir upstream                                                          | Noruega River       | Botumirim      | Lotic              |
| VIR11-LO  | Reservoir upstream                                                          | Corrente River      | Leme do Prado  | Lotic              |
| VIR70-LO  | Downstream of the powerhouse – 500 m from the escape channel                | Jequitinhonha River | Grão Mogol     | Lotic              |
| VIR95-LO  | Downstream of the powerhouse – in front of Coronel Paulo Fernandes school   | Jequitinhonha River | Coronel Murta  | Lotic              |
| VIR115-LO | Downstream of the powerhouse                                                | Jequitinhonha River | Virgem da Lapa | Lotic              |
| VIR20-LE  | Reservoir                                                                   | Jequitinhonha River | Turmalina      | Lentic             |
| VIR30-LE  | Reservoir                                                                   | Jequitinhonha River | Leme do Prado  | Lentic             |
| VIR40-LE  | Reservoir                                                                   | Jequitinhonha River | Grão Mogol     | Lentic             |
| VIR50-LE  | Reservoir                                                                   | Itacambiruçu River  | Cristália      | Lentic             |
| VIR60-LE  | Reservoir, 500 m from the dam                                               | Jequitinhonha River | Grão Mogol     | Lentic             |

**Table 2** | Surface water quality and standards set by CONAMA

| Parameter                 | Abbreviation                                  | Unit                                 | Standard |
|---------------------------|-----------------------------------------------|--------------------------------------|----------|
| Total alkalinity          | TAlc                                          | mg·L <sup>-1</sup> CaCO <sub>3</sub> | *        |
| Biochemical oxygen demand | BOD                                           | mg·L <sup>-1</sup> O <sub>2</sub>    | 5        |
| Dissolved oxygen          | DO                                            | mg·L <sup>-1</sup> O <sub>2</sub>    | >5       |
| Dissolved iron            | DFe                                           | mg·L <sup>-1</sup> Fe                | 0.3      |
| Electrical conductivity   | EC                                            | μS·cm <sup>-1</sup>                  | *        |
| Total ammoniacal nitrogen | N-NH <sub>4</sub> <sup>+</sup> pH ≤ 7.5       | mg·L <sup>-1</sup> N                 | 3.7      |
|                           | N-NH <sub>4</sub> <sup>+</sup> 7.5 < pH < 8.0 | mg·L <sup>-1</sup> N                 | 2        |
|                           | N-NH <sub>4</sub> <sup>+</sup> 8.0 < pH < 8.5 | mg·L <sup>-1</sup> N                 | 1        |
|                           | N-NH <sub>4</sub> <sup>+</sup> pH ≥ 8.5       | mg·L <sup>-1</sup> N                 | 0.5      |
| Nitrate                   | N-NO <sub>3</sub> <sup>-</sup>                | mg·L <sup>-1</sup> N                 | 10.0     |
| pH in loco                | pH                                            | -                                    | 6 to 9   |
| Water temperature         | Temperature                                   | °C                                   | *        |
| Thermotolerant coliforms  | Therm. coli.                                  | org.100 Ml <sup>-1</sup>             | 1,000    |
| Total dissolved solids    | TDS                                           | mg·L <sup>-1</sup>                   | 500      |
| Total phosphorus          | TP (lotic)                                    | mg·L <sup>-1</sup> P                 | 0.1      |
|                           | TP (lentic)                                   | mg·L <sup>-1</sup> P                 | 0.03     |
| Sulfate                   | SO <sub>4</sub> <sup>-2</sup> T               | mg·L <sup>-1</sup> P                 | 250      |
| Turbidity                 | Turb.                                         | NTU                                  | 100      |

\*No limit recommended by CONAMA.

calculated according to the watercourse classification for each station (Class 2). The limits are listed in Table 2.

### Trend analysis

The temporal trend analysis of the parameters was performed by station, using the Mann-Kendall test (MK) or Mann-Kendall Seasonal test (MKS), commonly used in temporal analysis of environmental data owing to its simplicity and robustness (Yenilmez et al. 2011). One assumption for the tests that produced reliable results was the lack of autocorrelation in the analysed data. In this study, the autocorrelation was verified through the autocorrelation function (ACF), which measures the degree of variable correlation at a given moment, with itself and at a later point in time.

The choice between MK and MKS was based on the presence or absence of seasonality within the data measured at different periods of the year, as this factor is a potential

source of variation in the water quality data series (Helsel & Hirsch 2002). Seasonality was analysed using the Kruskal-Wallis (KW) non-parametric statistical test, applied to the quarterly data for all parameters in each season. When  $p < 0.05$  in the KW test, the seasonality influence was considered to exist and the MKS test was applied. In cases where  $p > 0.05$ , the seasonality influence was considered to be non-existent and the parameter temporal trend was verified by the MK test.

The time trend was verified by Kendall's tau values ( $\tau$ ) calculated in MKS or MK. For  $p < 0.05$ , the trend was considered to exist, and the Kendall tau value ( $\tau$ ) determined whether this trend was upward (positive  $\tau$ ) or downward (negative  $\tau$ ). Statistical tests were performed using the programs XLSTAT<sup>®</sup> 2014.1.01 and/or Statistica<sup>®</sup> 8.0, at a significance level ( $\alpha$ ) of 5%.

### CCME WQI

The Brazilian legal limits set by CONAMA (Brazil 2005) were used in the CCME WQI calculation. The index is a combination of three factors that represent non-compliance with the proposed quality criteria to produce a single value (between 0 and 100) that describes water quality (CCME 2001).

F1 (scope) represents the percentage of variables that did not meet the objectives at least once during the time period under consideration ('failed variables'), relative to the total number of variables measured (Equation (1)):

$$F_1 = \left( \frac{\text{Number of failed variables}}{\text{Total number of variables}} \right) \times 100 \quad (1)$$

F2 (frequency) represents the percentage of individual tests that did not meet the objectives ('failed tests') (Equation (2)):

$$F_2 = \left( \frac{\text{Number of failed tests}}{\text{Total number of tests}} \right) \times 100 \quad (2)$$

F3 (amplitude) represents the amount by which failed test values did not meet their objectives. It is calculated in three steps.

(1) The number of times by which an individual concentration is greater than (or less than, when the objective

is a minimum) that of the objective is termed an ‘excursion’ and is expressed as follows.

When the test value did not exceed the objective (Equation (3)):

$$\Delta v = \left( \frac{\text{failed test value}}{\text{objective}} \right) - 1 \quad (3)$$

For cases in which the test value did not fall below the objective (Equation (4)):

$$\Delta v = \left( \frac{\text{objective}}{\text{failed test value}} \right) - 1 \quad (4)$$

- (2) The collective amount by which individual tests are out of compliance is calculated by summing the excursions of individual tests from their objectives and dividing it by the total number of tests (all those meeting objectives and not meeting objectives). This variable, referred to as the normalised sum of excursions (NSE) is calculated using Equation (5):

$$NSE = \frac{\sum_{i=1}^n \text{excursion}}{\text{total number of tests}} \quad (5)$$

- (3)  $F_3$  is then calculated using an asymptotic function that scales the normalised sum of the excursions from objectives (nse) to yield a range between 0 and 100 (Equation (6)):

$$F_3 = \frac{NSE}{(0,01 \times NSE) + 0,01} \quad (6)$$

Finally, the WQI can be calculated using Equation (7):

$$WQI = 100 - \left( \frac{\sqrt{F_1^2 + F_2^2 + F_3^2}}{1,732} \right) \quad (7)$$

The index ranges from 0 to 100 were divided into five categories by the CCME: (i) excellent (95–100), (ii) good (80–94), (iii) reasonable (65–79), (iv) marginal (45–64), and (v) terrible (0–44). The WQI methodology proposed by

CCME does not define the parameters but recommends a minimum of eight and a maximum of 20 parameters to be used in the calculation (CCME 2012). In this study, all monitored parameters that defined legal standards were considered (Table 2). The WQI was applied to each monitoring station and to each year. In the second step, the index was calculated by season, dry (April to September) and rainy (October to March), to analyse the influence of seasonality on the water quality.

## RESULTS AND DISCUSSION

### Legislation standards violations

Box-plot graphs with the standards violations of each parameter for all seasons are shown in Figure 2.

The legal limit violations registered for the pH occurred below the minimum allowed, highlighting the value of 2.99 recorded in 2017 for the station VIR10-LO. Acidic pH may be associated with the presence of red oxisols in the watershed, which in general are strongly acidic soils. In addition, the contact of aerated water from the reservoir with the dam, mainly a homogeneous pack of quartz-mica-shale containing sulphides disseminated in the rock matrix (Duarte et al. 2009), leads to the oxidation of sulphide minerals, resulting in low pH solutions that cause regional water acidification. Low pH values can affect growth or cause death in ichthyofauna. Wide pH variability can affect more sensitive organisms, even if the legal limits are not exceeded. In addition, low pH values can solubilise other metals, increasing environmental toxicity (Rodrigues 2002).

The high frequencies of dissolved Fe violations at all monitoring stations (31.7% to 80.5%) may be related to the local geochemical and pedological characteristics, such as the presence of red oxisols, which have a high  $\text{Fe}_2\text{O}_3$  content. An association between high iron content and soil characteristics was observed in the Nisa River (Czech Republic and Germany) (Kändler et al. 2017). The reservoir waters’ acidic pH can also contribute by reducing  $\text{Fe}^{+3}$  (insoluble) in  $\text{Fe}^{+2}$  (dissolved).

The high percentage of DO violation at the VIR70-LO station may be related to its location downstream from the powerhouse. The water intake of the HPP is 40 m deep,

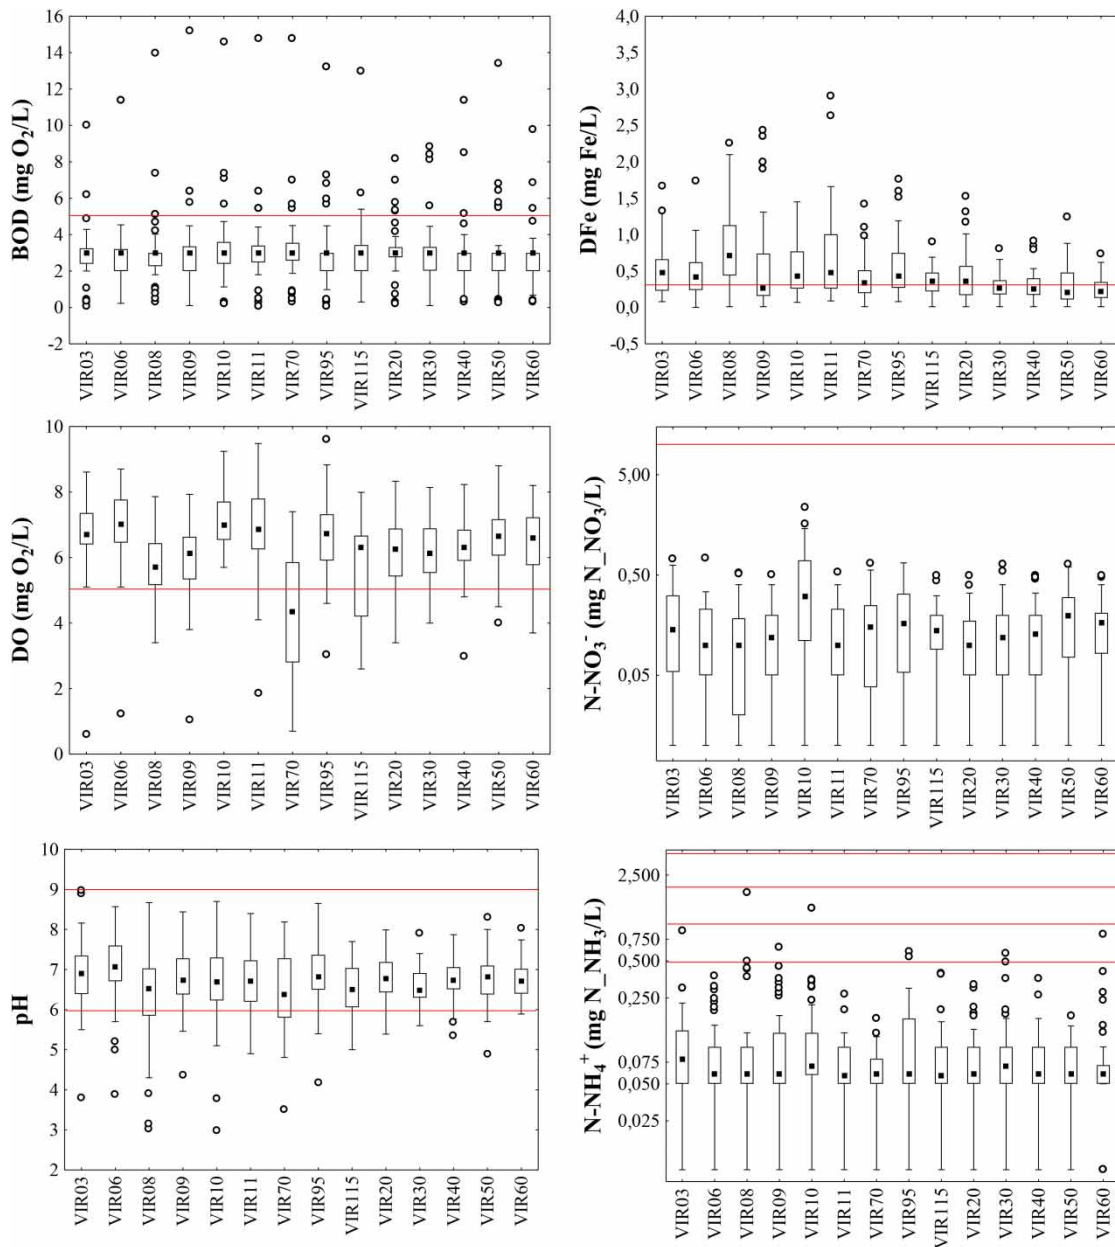

**Figure 2** | Variability of water quality parameters and legal standards violations of the monitoring stations of Irapé HPP Reservoir and its main tributaries. *Note:* The gray horizontal line represents the legal standard or standard range of each parameter.

and thus the water returned from the machines can be characterised as bottom water, which in general has lower DO values than those of surface water. The low DO values should be monitored as this is an extremely important parameter for aerobic aquatic organism respiration and has been used in the calculation of various WQIs since the 1960s (Tyagi *et al.* 2013). In addition, the decrease in DO

concentrations tends to influence chemical changes in the nutrient forms and metals, in addition to other water quality parameters, which may become available in the environment and/or have their values changed (Ashby 2009).

The parameters  $\text{N-NO}_3^-$ ,  $\text{N-NH}_4^+$ , and  $\text{SO}_4^{2-}$  T did not exceed the legal limits, while the TDS showed a violation in a single sampling campaign at station VIR20-LE (2.4%).

However, the pH, BOD, and TP limits were violated at least once in every season and in all years of the historical series, with percentages varying between 4.8% and 34.9%; 2.4% and 14.3%; and 12.2% and 26.8%, respectively. BOD and TP are important indicators of organic pollution in water bodies. High BOD loads mainly originate from anthropogenic sources, including domestic and animal waste, industrial emissions, and sewage releases (Vigiak et al. 2019). These high values indicate a great demand for oxygen that is necessary to break down the organic matter present in the water body through bacterial respiratory activity, consequently decreasing the concentration of available DO. The bioavailable forms of phosphorus, together with inorganic nitrogen, play an important role in aquatic ecology. Excess phosphorus can lead to eutrophication of water resources, which can cause ecological and toxicological effects that are directly or indirectly related to primary producer proliferation (Wang et al. 2009; Moal et al. 2019).

For TP, 78% of the values above the limit occurred during the rainy season, indicating a greater transport of allochthonous material to the reservoir during this period by surface runoff. Yenilmez et al. (2011) and Li et al. (2019) found a statistically positive relationship between TP and precipitation when analysing the water quality of Lake Eymir in Turkey and the Three Gorges Reservoir in China, respectively, concluding that the parameter is introduced into the lake by runoff. In Irapé, the effects of agricultural or silvicultural practices in the tributary area, the main anthropic uses observed in the watershed (Silva & Miranda 2015), could be responsible for the TP contribution. The turbidity behaviour, with higher percentages of violation in the tributaries, although without the occurrence of values above the legal limits, reinforces this hypothesis. The reservoirs' low turbidity can be explained by the sedimentation effect, as also observed by Li et al. (2019) in the Three Gorges Reservoir region, China, and in the Nova Ponte Reservoir, Brazil by Christofaro et al. (2017).

Thermotolerant coliforms have a higher percentage of standards violations in the tributaries in relation to the reservoir. This parameter has a strong connection with point sources of untreated sanitary sewage, indicating that the tributaries are affected by this type of pollution. The highest percentage of violation of thermotolerant coliforms occurred at the VIR11-LO station (30%), located on the

right arm of the main river, indicating that the flow rates and conditions for regeneration in the region reduce the impact of domestic sewage release (even if untreated).

### Trend analysis of the reservoir water quality parameters and main tributaries

The autocorrelation coefficient did not reach a significant value for most parameters, except for isolated occurrences of autocorrelation for  $\text{SO}_4^{2-}$  T (Figures S1 to S14). Thus, the Mann–Kendall tests (MK or MKS) were used for all parameters at all stations.

The temperature showed a substantial seasonal variation, with values significantly higher ( $p < 0.05$ ) in the rainy season in 11 stations. For the other parameters, seasonal differences, when detected, indicated higher levels during the rainy season (Table 3).

The  $\text{N-NH}_4^+$  and DFe were the parameters that showed the highest time trend occurrences, detected in 78.6% and 64.3% of the monitoring stations, respectively. The tendency to increase  $\text{N-NH}_4^+$  may be associated with a greater contribution from agricultural sources in the basin, which may result in greater toxicity to aquatic organisms as well as a reduction in DO concentration in the water. However, the concentrations of  $\text{N-NH}_4^+$  did not exceed the legal standards. On the other hand, the DFe has a significant impact and a tendency to increase the reservoir water quality and its tributaries, which can be associated with an increase in soil exposure in the watershed over the study period.

Turbidity showed an upward trend at eight stations (57.1%), with five inside the reservoir. Although there are still no representative standards violations, the results indicate the need to adopt measures to control turbidity, especially in relation to tributaries and the reservoir surroundings.

Only TDS and thermotolerant coliforms showed significant reduction trends. All stations located in the reservoir presented a temporal tendency to reduce thermotolerant coliforms, two other stations are on the main river (Jequitinhonha River), immediately downstream of the water mirror (VIR70-LO and VIR115-LO). These results indicate that the point source effects of sanitary sewage on reservoir waters decreased over the study period.

**Table 3** | Influence of seasonality and temporal trends of the analysed parameters in each monitoring station of the Irapé HPP Reservoir and its main tributaries**Parameters**

| Stations  | TAlc* | Therm. coli. | EC* | BOD       | DFe       | TP        | N-NO <sub>3</sub> <sup>-</sup> | N-NH <sub>4</sub> <sup>+</sup> | DO        | pH        | TDS      | SO <sub>4</sub> <sup>-2</sup> T | Temp* | Turb.     |
|-----------|-------|--------------|-----|-----------|-----------|-----------|--------------------------------|--------------------------------|-----------|-----------|----------|---------------------------------|-------|-----------|
| VIR03-LO  |       | W (17.1%)    |     | (4.9%)    | (63.4%)   | W (22.0%) | W (0.0%)                       | (0.0%)                         | D (2.4%)  | (11.9%)   | ↓ (0.0%) | (0.0%)                          | W     | ↑ (17.5%) |
| VIR06-LO  | D     | W (22.5%)    |     | ↑ (2.4%)  | W (68.3%) | W (20.0%) | W (0.0%)                       | ↑ (0.0%)                       | (2.5%)    | (9.8%)    | (0.0%)   | (0.0%)                          |       | W (18.0%) |
| VIR08-LO  |       | (12.5%)      |     | ↑ (9.8%)  | ↑ (80.5%) | (15.4%)   | ↓ (0.0%)                       | (0.0%)                         | (22.5%)   | (31.7%)   | ↓ (0.0%) | (0.0%)                          | W     | W (7.9%)  |
| VIR09-LO  |       | (24.3%)      |     | (9.8%)    | ↑ (43.9%) | (15.8%)   | ↑ (0.0%)                       | ↑ (0.0%)                       | (22.5%)   | (12.2%)   | (0.0%)   | (0.0%)                          | W     | ↑ (5.4%)  |
| VIR10-LO  |       | W (17.5%)    | ↑   | (9.8%)    | ↑ (68.3%) | (22.5%)   | D (0.0%)                       | (0.0%)                         | (0.0%)    | ↓ (19.5%) | (0.0%)   | (0.0%)                          | ↑     | (5.6%)    |
| VIR11-LO  |       | W (30.0%)    | ↑   | (9.5%)    | ↑ (72.5%) | (20.0%)   | (0.0%)                         | ↑ (0.0%)                       | (7.3%)    | (16.7%)   | (0.0%)   | (0.0%)                          |       | W (5.3%)  |
| VIR70-LO  |       | W ↓ (13.2%)  |     | (10.0%)   | ↑ (58.1%) | (14.3%)   | (0.0%)                         | ↑ (0.0%)                       | ↑ (66.7%) | ↑ (34.9%) | (0.0%)   | (0.0%)                          | D     | ↑ (2.6%)  |
| VIR95-LO  |       | W (24.4%)    |     | ↑ (12.2%) | ↑ (63.4%) | (24.4%)   | W (0.0%)                       | ↑ (0.0%)                       | (5.0%)    | (12.2%)   | (0.0%)   | (0.0%)                          | W     | W (26.3%) |
| VIR115-LO |       | ↓ (15.8%)    |     | (8.6%)    | (60.5%)   | (13.2%)   | (0.0%)                         | ↑ (0.0%)                       | ↑ (27.0%) | (18.4%)   | ↓ (0.0%) | (0.0%)                          | W     | (5.9%)    |
| VIR20-LE  |       | ↓ (2.8%)     |     | (12.5%)   | ↑ (56.4%) | (26.8%)   | (0.0%)                         | ↑ (0.0%)                       | (5.0%)    | D (14.6%) | (2.4%)   | (0.0%)                          | W     | ↑ (0.0%)  |
| VIR30-LE  | W     | ↓ (2.7%)     |     | (10.0%)   | ↑ (46.3%) | (17.1%)   | (0.0%)                         | ↑ (0.0%)                       | (12.5%)   | (10.0%)   | ↓ (0.0%) | (0.0%)                          | W     | ↑ (0.0%)  |
| VIR40-LE  | W     | ↓ (2.9%)     |     | ↑ (7.1%)  | (39.0%)   | ↑ (12.2%) | (0.0%)                         | ↑ (0.0%)                       | (4.9%)    | (7.1%)    | ↓ (0.0%) | (0.0%)                          | W     | ↑ (0.0%)  |
| VIR50-LE  |       | ↓ (5.7%)     |     | (14.3%)   | ↑ (38.1%) | (23.1%)   | (0.0%)                         | ↑ (0.0%)                       | (4.9%)    | (14.3%)   | ↓ (0.0%) | (0.0%)                          | W     | ↑ (0.0%)  |
| VIR60-LE  |       | ↓ (0.0%)     |     | (7.1%)    | (31.7%)   | (17.1%)   | (0.0%)                         | ↑ (0.0%)                       | (2.4%)    | (4.8%)    | (0.0%)   | (0.0%)                          | W     | ↑ (0.0%)  |

(↑) = upward trend; (↓) = downward trend; ( ) = no trend; (W) = influence of seasonality with higher values observed in the rainy season; (D) = influence of seasonality with higher values observed in the dry season; (\*) = no standard limit in the legislation.



## CCME WQI application

Table 4 shows the CCME WQI values obtained in the seasons for the years in which there were quarterly samplings.

WQI values ranged between 54.68 and 100.00. Of the 88 indices calculated, one point, in 2014 (VIR06-LO), was classified as excellent, 61.3% were classified as good, indicating that they rarely differed from the legal limits, and 29.5% were acceptable, which sometimes went over the legislation limits. Only 8.0% fell into the bad range (they often violated legal limits), with no record of the very poor class. The monitoring points located inside the reservoir were generally classified as good, except for in 2009.

The better water quality at the reservoir's monitoring points indicated that the water body reduced the effects of pollution from tributaries, as observed by Xing et al. (2015), when comparing the water quality of the Danjiangkou Reservoir in China with the rivers that supply it. This reduction can be caused by changes in river dynamics, such as a decrease in water flow velocity and the consequent deposition of pollutants by sedimentation, a phenomenon common to lentic environments (Wang et al. 2009; Li et al. 2019).

Gao et al. (2016) also found similar results for the Three Gorges Reservoir, the largest hydroelectric project in the

world, in which the decrease in concentrations of heavy metals from upstream to downstream was associated with reservoir self-purification, which was stable and acceptable from 2008 to 2013. Other studies have also shown that the CCME WQI is a valuable means of monitoring, communicating, and understanding surface water quality (Hurley et al. 2012; Ahmed et al. 2020).

Table 5 presents the WQI seasonality, considering the dry and rainy seasons. There is a deterioration of the index values in the rainy season (October to March), indicating a greater supply of nutrients with rain during this period, suggesting a predominance of diffuse pollution sources (Barbosa et al. 2019). In addition, the amplitude of reservoir seasonal variation was less than that observed for the tributaries.

The existing impacts on the water quality of the Irapé Reservoir have natural and anthropic origins and they can be intensified during rainy seasons. However, even though some problems have a natural origin, they can be aggravated by human actions, such as inadequate soil management in agricultural practices in the region. One strategy that can be adopted to minimise this problem is investment in reforestation and environmental restoration, where the vegetation acts as a filter and barrier for rainwater surface runoff,

**Table 4** | CCME WQI by season and year, applied to the Irapé HPP monitoring database and main tributaries

| Station   | Year |       |      |       |       |      |        |       |       |      |       |
|-----------|------|-------|------|-------|-------|------|--------|-------|-------|------|-------|
|           | 2008 | 2009  | 2010 | 2011  | 2012  | 2013 | 2014   | 2015  | 2016  | 2017 | 2018  |
| VIR03-LO  | -    | 76.22 | -    | 82.11 | 85.72 | -    | 93.90  | 94.03 | 86.07 | -    | 69.62 |
| VIR06-LO  | -    | 76.01 | -    | 77.83 | 87.15 | -    | 100.00 | -     | 81.25 | -    | 81.65 |
| VIR08-LO  | -    | 63.94 | -    | 59.74 | 84.19 | -    | 94.18  | -     | 70.83 | -    | 73.08 |
| VIR09-LO  | -    | 72.19 | -    | 63.03 | 89.14 | -    | 88.62  | -     | 72.34 | -    | 86.29 |
| VIR10-LO  | -    | 70.21 | -    | 77.34 | 76.75 | -    | 83.69  | -     | 89.59 | -    | 82.86 |
| VIR11-LO  | -    | 68.75 | -    | 82.14 | 73.82 | -    | 82.24  | -     | 74.05 | -    | 77.69 |
| VIR70-LO  | -    | 62.69 | -    | 81.25 | 70.59 | -    | 72.02  | -     | 80.44 | -    | -     |
| VIR95-LO  | -    | 72.07 | -    | 88.69 | 68.16 | -    | 89.17  | 69.21 | 62.81 | -    | 82.39 |
| VIR115-LO | -    | 54.68 | -    | 83.32 | 82.54 | -    | -      | -     | 75.27 | -    | -     |
| VIR20-LE  | -    | 60.04 | -    | 87.46 | 80.65 | -    | 83.73  | 81.97 | 79.77 | -    | 80.24 |
| VIR30-LE  | -    | 70.06 | -    | 86.45 | 82.36 | -    | 83.68  | 94.58 | 92.72 | -    | 86.60 |
| VIR40-LE  | -    | 71.76 | -    | 93.74 | 91.35 | -    | 94.58  | 91.51 | 88.22 | -    | 88.03 |
| VIR50-LE  | -    | 71.51 | -    | 87.17 | 86.62 | -    | 83.69  | 87.90 | 90.64 | -    | 88.21 |
| VIR60-LE  | -    | 71.94 | -    | 92.99 | 89.70 | -    | 88.70  | 94.50 | 91.11 | -    | 94.10 |

Excellent
  Good
  Acceptable
  Bad
  Very bad
 (-) no quarterly sampling

**Table 5** | WQI by season, applied to the Irapé HPP monitoring database and main tributaries

| Monitoring stations |          |           |          |          |          |          |          |
|---------------------|----------|-----------|----------|----------|----------|----------|----------|
| Season              | VIR03-LO | VIR06-LO  | VIR08-LO | VIR09-LO | VIR10-LO | VIR11-LO | VIR70-LO |
| Rainy               | 66.11    | 67.66     | 64.27    | 58.38    | 63.19    | 65.27    | 58.99    |
| Dry                 | 93.75    | 94.05     | 70.83    | 76.96    | 78.13    | 78.08    | 71.43    |
| Monitoring stations |          |           |          |          |          |          |          |
| Season              | VIR95-LO | VIR115-LO | VIR20-LE | VIR30-LE | VIR40-LE | VIR50-LE | VIR60-LE |
| Rainy               | 59.52    | 66.11     | 72.3     | 73.03    | 89.25    | 77.17    | 83.95    |
| Dry                 | 66.83    | 69.98     | 76.06    | 73.96    | 81.67    | 88.69    | 81.51    |

Good
  Acceptable
  Bad

preventing erosion caused by the direct impact of raindrops on the soil.

In this sense, Li *et al.* (2019) note that the Chinese government's investments in reforestation and environmental restoration has positive impacts on reservoir water quality. In addition, it is important to emphasise that actions for the management of this and other reservoirs include the awareness and environmental education of the region's population, including promoting the dissemination of and access to information related to water quality. It should also be noted that management must occur in an integrated manner, based on an understanding of the structure and functioning of the reservoir as an ecosystem, through the use of surveys and soil occupation in its surroundings, and with the help of the local communities.

## CONCLUSION

High Fe concentrations and a large percentage of stations with an increasing trend indicate the increase of soil exposure in the watershed. Despite not exceeding legal standards,  $N-NH_4^+$  showed an upward trend in 64% of the monitoring stations, which may be related to an increase in the contribution of agricultural runoff. The agricultural use of the soil can also be related to the TP contribution to the reservoir and tributaries and to the turbidity values that violated the limit in the tributaries. The occurrence of low pH values must be monitored, and they may be related

to the presence of iron sulphides in the region. The thermo-tolerant coliforms showed a downward trend, mainly in the reservoir monitoring stations, indicating a reduction in the effect of point sources of sanitary sewage discharge.

The reservoir water quality and its tributaries were considered adequate during the study period, with approximately 61% of the 88 WQI qualifying as good, 29.5% as acceptable, and 8.0% as bad. The reservoir points are of better quality than the tributaries, and the WQI assessment showed a deterioration in the rainy season, reinforcing the influence of diffuse sources on water quality. The application of the CCME WQI together with temporal statistical analysis showed a potential contribution to the interpretation of environmental monitoring data, generating important information for reservoir water quality management. Therefore, the results can support control and management measures in specific stretches of watersheds, with a focus on the most relevant polluting sources.

## ACKNOWLEDGEMENTS

The authors would like to thank the Energy Company of Minas Gerais State (Cemig), the Foundation for Research Support of the State of Minas Gerais (FAPEMIG), the Coordination for the Improvement of Higher Education Personnel (CAPES), and the National Council of Technological and Scientific Development (CNPq) for their support and cooperation during the research.

## DATA AVAILABILITY STATEMENT

All relevant data are included in the paper or its Supplementary Information.

## REFERENCES

- Ahmed, S., Shadabkhusid, K., Madan, R., Abu Amarah, B. A. & Naushad, M. 2020 *Water quality assessment of shallow aquifer based on Canadian Council of Ministers of the Environment index and its impact on irrigation of Mathura District, Uttar Pradesh. Journal of King Saud University* **32** (1), 1218–1225. <https://doi.org/10.1016/j.jksus.2019.11.019>.
- Ashby, S. 2009 *Impacts of hydrology and hydropower on water quality in reservoir tailwaters. WIT Transactions on Ecology and the Environment* **124**, 55–56. doi:10.2495/RM090061.
- Barbosa, A. G., Santos, K. M. S. & Michelan, D. C. G. S. 2019 *Avaliação da sazonalidade da qualidade da água do açude da Macela em Itabaiana/SE. Scientia cum Industria* **7** (3), 24–31. <http://dx.doi.org/10.18226/23185279.v7iss3p24>.
- Brazil 2005 *Resolução N. 357, de 17 de Março de 2005*. National Environmental Council (CONAMA), Environmental Guidelines for Water Resources and Standards for the Release of Effluents (in Portuguese).
- CCME – Canadian Council of Ministers of the Environment 2001 *Canadian Sediment Quality Guidelines for the Protection of Aquatic Life – Polychlorinated Dibenzo-P-Dioxins and Polychlorinated Dibenzofurans (PCDD/Fs)*. CCME, Ottawa.
- CCME – Canadian Council of Ministers of the Environment 2012 *Synthesis of Research and Application of the CCME Water Quality Index*. CCME, Winnipeg.
- Cemig – Companhia Energética de Minas Gerais 2009 *Manual de Procedimentos de Coleta E Metodologias de Análise de Água: SISÁGUA*. Cemig, Belo Horizonte, p. 77.
- Christofaro, C., Leão, M. M. D., Oliveira, S. C., Viana, D. T., Amorim, C. C. & Carvalho, M. D. 2017 Spatio-temporal variations of water quality in Nova Ponte Reservoir, Araguari River Basin, Brazil. *Water Science & Technology: Water Supply* **17** (6), 1507–1514. <https://doi.org/10.2166/ws.2017.055>.
- Duarte, J., Filho, P. L. M., Calcina, A. M. & Wunder, E. 2009 Underground works of the Irapé power plant in Brazil in a sulfide-rich rock mass – special features and measures for concrete protection. In: *ITA World Tunnel Congress*, Budapest.
- Gao, Q., Li, Y., Cheng, Q., Yu, M., Hu, B., Wang, Z. & Yu, Z. 2016 *Analysis and assessment of the nutrients, biochemical indexes and heavy metals in the Three Gorges Reservoir, China, from 2008 to 2013. Water Research* **92**, 262–274. <https://doi.org/10.1016/j.watres.2015.12.055>.
- Helsel, D. R. & Hirsch, R. M. 2002 *Statistical Methods in Water Resources*. Elsevier Science Publishers B.V, Amsterdam, p. 525. <https://doi.org/10.3133/twri04A3>
- Hurley, T., Sadiq, R. & Mazumder, A. 2012 *Adaptation and evaluation of the Canadian Council of Ministers of the Environment Water Quality Index (CCME WQI) for use as an effective tool to characterize drinking source water quality. Water Research* **46** (11), 3544–3552. <https://doi.org/10.1016/j.watres.2012.03.061>.
- Kändler, M., Blechinger, K., Seidler, C., Pavlů, V., Šanda, M., Dostál, T., Krása, J., Vitvar, T. & Štich, M. 2017 *Impact of land use on water quality in the upper Nisa catchment in the Czech Republic and in Germany. Science of the Total Environment* **586**, 1316–1325. <https://doi.org/10.1016/j.scitotenv.2016.10.221>.
- Li, Z., Ma, J., Guo, J., Paerl, H. W., Brookes, J. D., Xiao, Y., Fang, F., Ouyang, W. & Lu, L. 2019 *Water quality trends in the Three Gorges Reservoir region before and after impoundment (1992–2016). Ecohydrology & Hydrobiology* **19** (3), 317–327. <https://doi.org/10.1016/j.ecohyd.2018.08.005>.
- Moal, M. L., Gascuel-Oudou, C., Ménesguen, A., Souchond, Y., Étrillard, C., Levain, A., Moatard, F., Pannard, A., Souchu, F., Lefebvre, A. & Pinaya, G. 2019 *Eutrophication: a new wine in an old bottle? Science of The Total Environment* **651**, 1–11.
- Penev, S., Leonte, D., Lazarov, Z. & Mann, R. A. 2014 *Applications of MIDAS regression in analysing trends in water quality. Journal of Hydrology* **511**, 151–159.
- Rodrigues, L. M. 2002 *Alterações Espaciais E Temporais de Características Limnológicas Resultantes da Transformação rio-Reservatório na área do Reservatório da Usina Hidrelétrica Dona Francisca, RS, Brasil*. Master's thesis, Universidade Federal do Rio Grande do Sul, Porto Alegre, p. 100.
- Rosemond, S., Duro, D. & Dubé, M. 2008 *Comparative analysis of regional water quality in Canada using the Water Quality Index. Environmental Monitoring and Assessment* **156** (223). <https://doi.org/10.1007/s10661-008-0480-6>
- Silva, T. V. & Miranda, G. H. R. 2015 *Análise das Variáveis da Geografia Física E Humana sob A Mesorregião do Vale do Jequitinhonha*. Uberlândia.
- Tomasella, J., Vieira, R. M. S. P., Barbosa, A. A., Rodriguez, D. A., Santana, M. O. & Sestini, M. F. 2018 *Desertification trends in the Northeast of Brazil over the period 2000–2016. International Journal of Applied Earth Observation and Geoinformation* **73**, 197–206. <https://doi.org/10.1016/j.jag.2018.06.012>.
- Tyagi, S., Sharma, B., Singh, P. & Dobhal, R. 2013 *Water quality assessment in terms of water quality index. American Journal of Water Resources* **1** (3), 34–38. doi:10.12691/ajwr-1-3-3.
- Vigiak, O., Grizzetti, B., Udias-Moinelo, A., Zanni, M., Dorati, C., Bouraoui, F. & Alberto, P. 2019 *Predicting biochemical oxygen demand in European freshwater bodies. Science of The Total Environment* **666**, 1089–1105.
- Wang, Y., Shen, Z., Niu, J. & Liu, R. 2009 *Adsorption of phosphorus on sediments from the Three-Gorges Reservoir*

- (China) and the relation with sediment compositions. *Journal of Hazardous Materials* **162** (1), 92–98. <https://doi.org/10.1016/j.jhazmat.2008.05.013>.
- Xing, X. K., Li, K. F., Finlayson, B. & Yin, W. 2015 [Evaluation, prediction, and protection of water quality in Danjiangkou Reservoir, China](#). *Water Science and Engineering* **8** (1), 30–39. <https://doi.org/10.1016/j.wse.2014.11.001>.
- Yenilmez, F., Keskin, F. & Aksoy, A. 2011 [Water quality trend analysis in Eymir Lake, Ankara](#). *Physics and Chemistry of the Earth* **36**, 135–140. <https://doi.org/10.1016/j.pce.2010.05.005>.

First received 23 August 2020; accepted in revised form 9 December 2020. Available online 28 December 2020
